# Supplementary material for: Fused Deposition Modeling (FDM) 3D Printed Tablets for Intragastric Floating Delivery of Domperidone
Source: PubMed Central journal article supplement (PMC5460192; doi:10.1038/s41598-017-03097-x), 2017-06-06
Supplement: 41598_2017_3097_MOESM1_ESM.pdf [file 41598_2017_3097_MOESM1_ESM.pdf]

Supplementary information for

## **Fused Deposition Modeling (FDM) 3D Printed Tablets for Intragastric Floating Delivery of Domperidone**

Xuyu Chai<sup>1</sup>, Hongyu Chai<sup>1</sup>, Xiaoyu Wang<sup>2</sup>, Jingjing Yang<sup>1</sup>, Jin Li<sup>1</sup>, Yan Zhao<sup>1</sup>, Weimin Cai<sup>3</sup>, TaoTao<sup>1</sup>&Xiaoqiang Xiang<sup>3</sup>

<sup>1</sup>National Pharmaceutical Engineering Research Center, China State Institute of Pharmaceutical Industry, Shanghai, 201203, P.R. China

<sup>2</sup>Experiment Center for Science and Technology, Shanghai University of Traditional Chinese Medicine, Shanghai, 201203, P.R. China

<sup>3</sup>Department of Clinical Pharmacy, School of Pharmacy, Fudan University, Shanghai, 201203, P.R. China

Correspondence and requests for materials should be addressed to T.T. (email: taotao@sinopharm.com) or X.X. (email: xiangxq@fudan.edu.cn)

**Table S1.** Formulation and extrusion parameters of filaments

| Formulation(weight ratio)   | Extrusion temperature (°C ) | Screw speed(rpm) | Torque(N/cm) |
|-----------------------------|-----------------------------|------------------|--------------|
| HPC-EXF                     | 145                         | 20-25            | 10-18        |
| HPC-EXF:DOM=90:10           | 145                         | 20-25            | 10-20        |
| HPC-EXF:DOM:BaSO4= 80:10:10 | 150                         | 20-25            | 12-20        |

**Table S2.** Formulation and designed physical parameters of DOM-FSR tablets

| Formulation code | Formulation composition (weight ratio) (%) | Designed dimensions (D×H) (mm) | Shell number | Infill percentage (%) |
|------------------|--------------------------------------------|--------------------------------|--------------|-----------------------|
| F1               | HPC-EXF:DOM(90:10)                         | 10×3.2                         | 1            | 0                     |
| F2               | HPC-EXF:DOM(90:10)                         | 10×3.2                         | 2            | 0                     |
| F3               | HPC-EXF:DOM(90:10)                         | 10×3.2                         | 3            | 0                     |
| F4               | HPC-EXF:DOM(90:10)                         | 10×3.2                         | 4            | 0                     |
| F5               | HPC-EXF:DOM(90:10)                         | 10×3.2                         | 2            | 10                    |
| F6               | HPC-EXF:DOM(90:10)                         | 10×3.2                         | 2            | 20                    |
| F7               | HPC-EXF:DOM(90:10)                         | 10×3.2                         | 2            | 30                    |
| F8               | HPC-EXF:DOM(90:10)                         | 7.4×6                          | 2            | 0                     |
| F9               | HPC-EXF:DOM:BaSO4( 80:10:10)               | 7.4×6                          | 2            | 0                     |

**Table S3.** Measured physical parameters and floating time duration of DOM-FSR tablets (n=6)

| Formulation code | Measured volume (mm <sup>3</sup> ) | Measured mass (mg) | Tablet density (mg/mm <sup>3</sup> ) | Floating time (h) |
|------------------|------------------------------------|--------------------|--------------------------------------|-------------------|
| F1               | 258.97±3.30                        | 181.02±0.95        | 0.70±0.01                            | >8                |
| F2               | 261.95±4.71                        | 200.67±0.41        | 0.77±0.01                            | >10               |
| F3               | 260.18±3.95                        | 219.57±5.43        | 0.84±0.02                            | >10               |
| F4               | 257.92±2.70                        | 239.05±3.34        | 0.93±0.03                            | <1                |
| F5               | 260.70±2.50                        | 217.42±1.84        | 0.83±0.01                            | >10               |
| F6               | 261.48±4.47                        | 231.34±0.91        | 0.88±0.01                            | >10               |
| F7               | 260.12±6.15                        | 244.63±1.73        | 0.94±0.02                            | <1                |
| F8               | 261.22±2.18                        | 199.85±2.09        | 0.77±0.01                            | >10               |
| F9               | 260.98±2.47                        | 225.45±0.40        | 0.86±0.01                            | >10               |

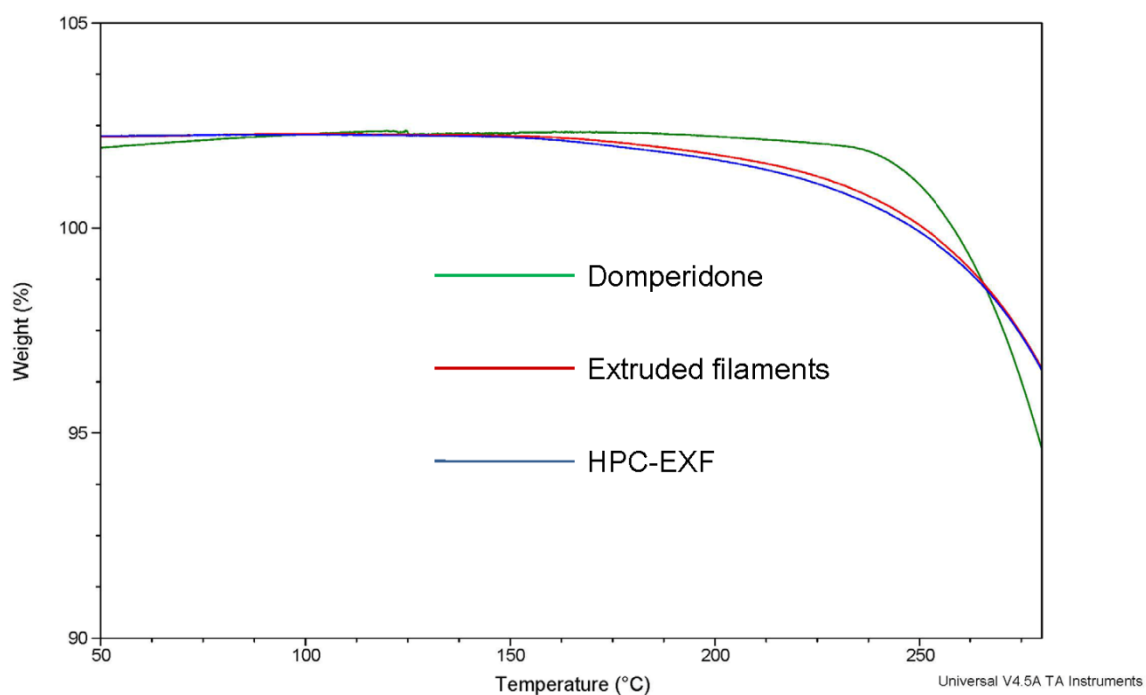

**Fig.S1.** TGA thermo traces for DOM, HPC-EXF and extruded filaments (DOM10%).

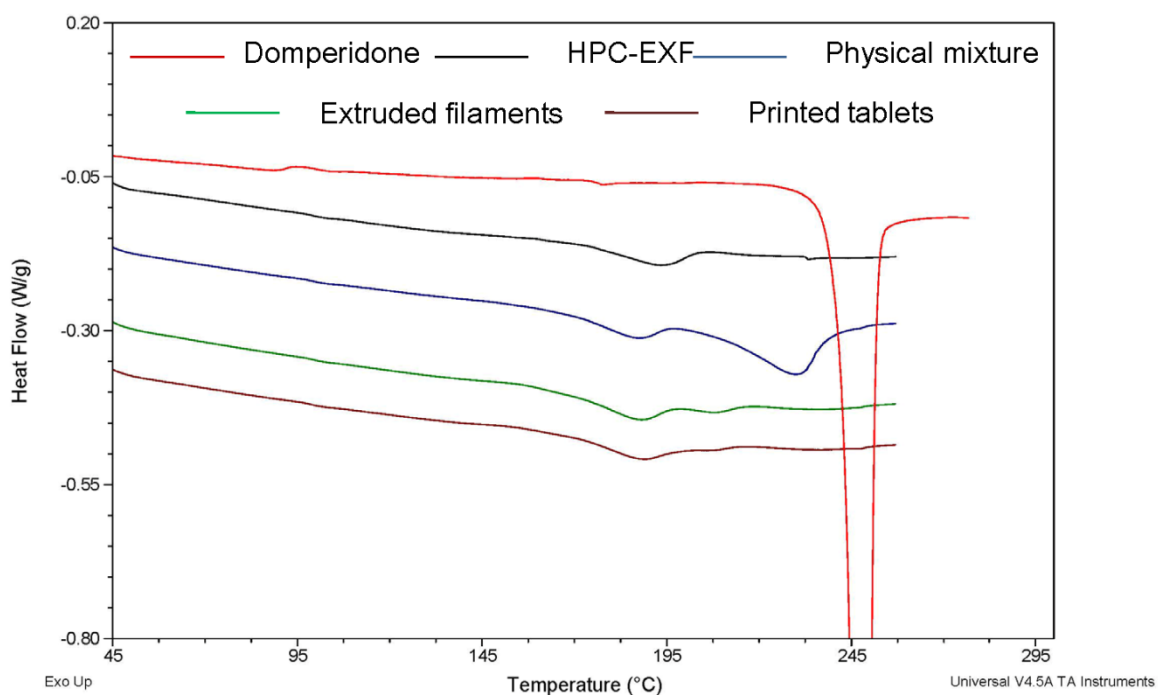

**Fig.S2.** DSC thermographs of DOM, HPC-EXF, physical mixture (DOM10%), extruded filaments (DOM10%) and printed tablets (DOM10%).

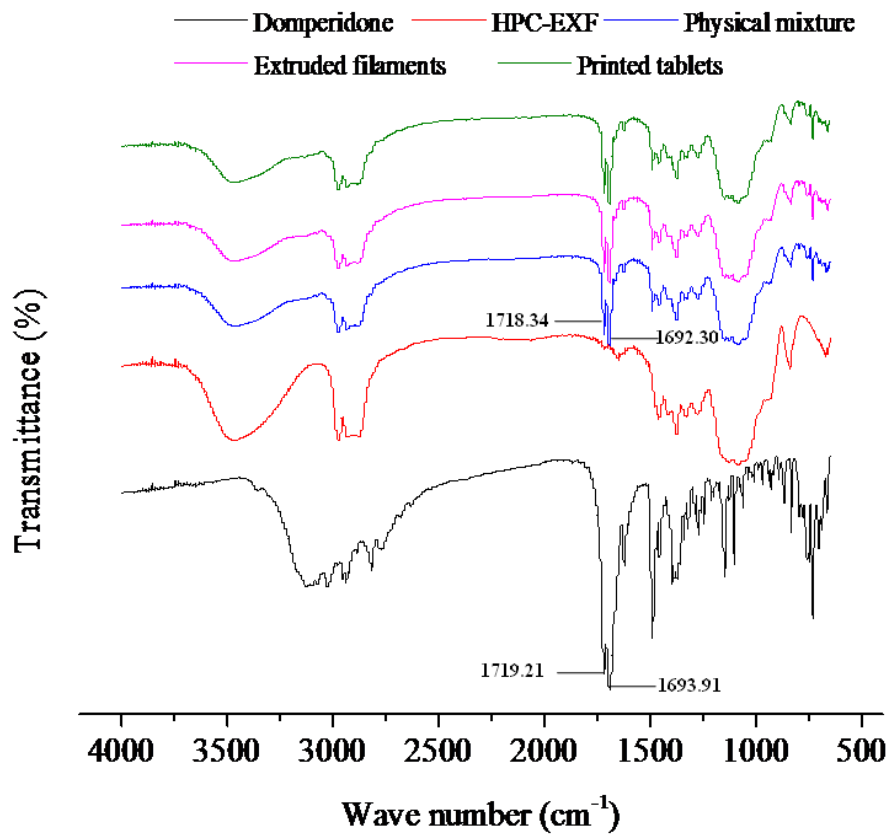

**Fig.S3.** FT-IR spectra of DOM, HPC-EXF, physical mixture (DOM10%), extruded filaments (DOM10%) and printed tablets (DOM10%).

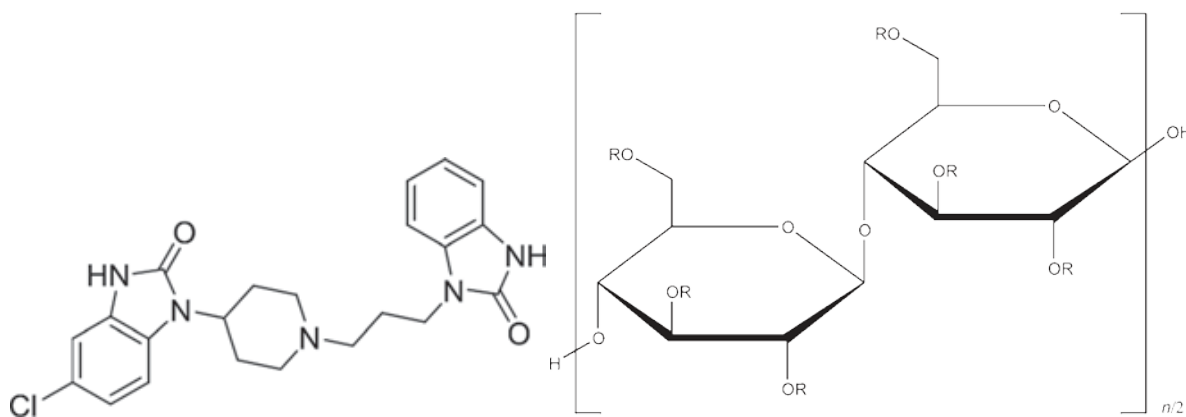

**Fig.S4.** Chemical structure of DOM and HPC (R is H or  $[\text{CH}_2\text{CH}(\text{CH}_3)\text{O}]_m\text{H}$  where m is a common integral number of cellulose derivatives).

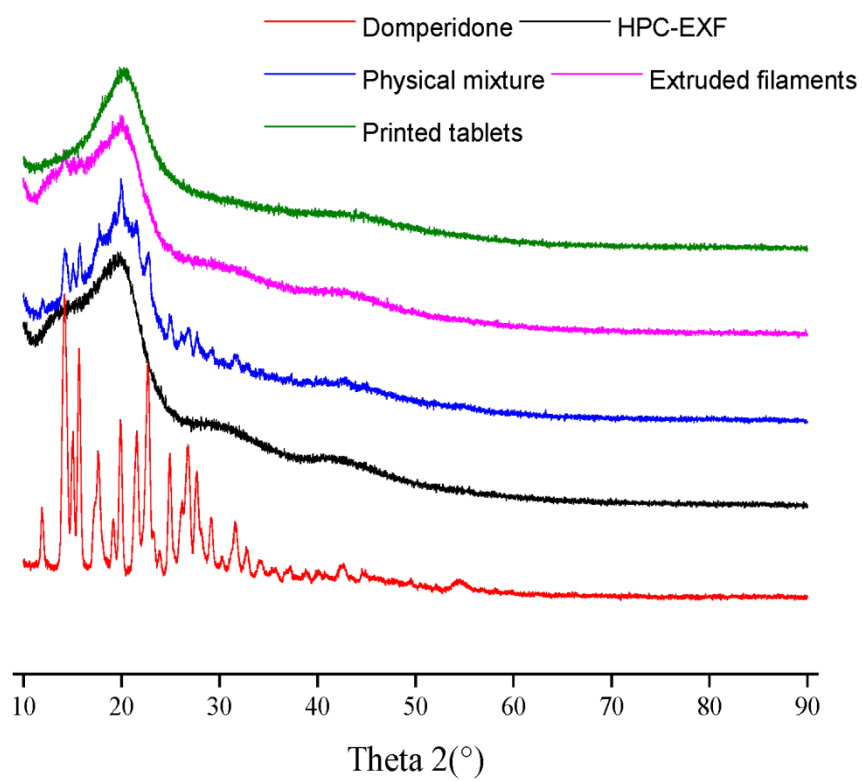

1

**Fig.S5.** XRPD spectra of DOM, HPC-EXF, physical mixture (DOM10%), extruded filaments (DOM10%) and printed tablets (DOM10%).
